# Supplementary material for: Acceptance of mHealth among health professionals: a case study on anesthesia practitioners
Source: Springer Nature journal article supplement (doi:10.1186/s12871-020-00958-3), 2020-03-03

# Anesthesia and m-Health

\*Required

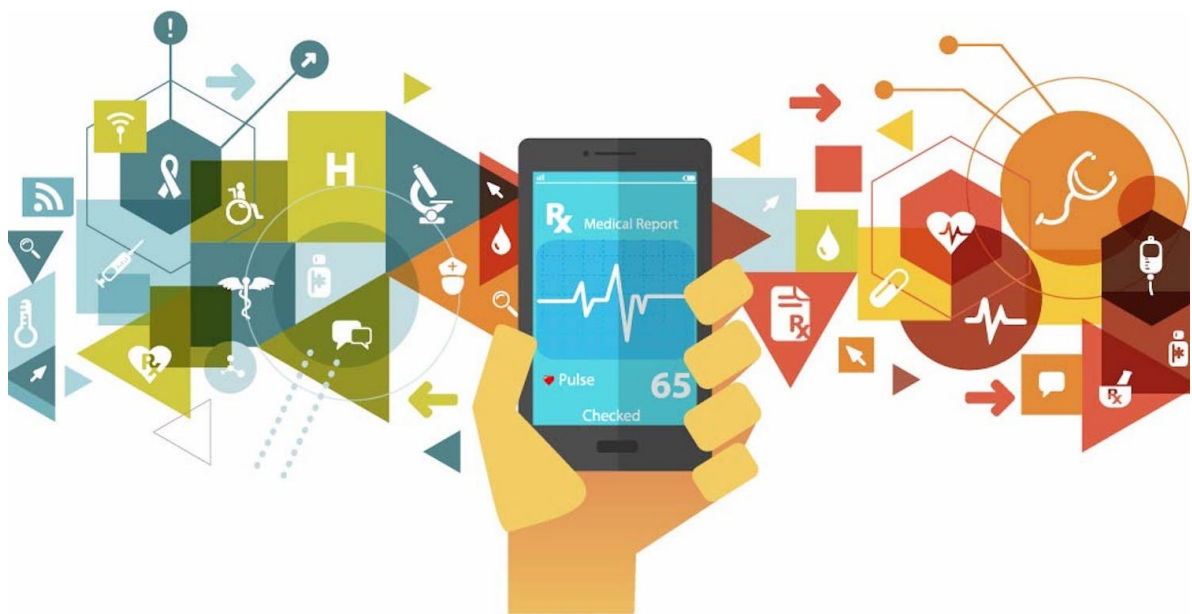

## Aim

This 3 minute survey aims to better define the wishes/needs of the Anesthesiologist within the field of mobile technology.

What would help you improve your daily practice ?

## Specialty Degree \*

- Trainee / Specialty Registrar
- Recognized Specialist / Consultant

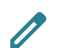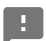

Country of Practice \*

Your answer

Subspecialty \*

- Paediatric Anesthesia
- Cardio-thoracic Anesthesia
- Neuro-Anesthesia
- Orthopedic Anesthesia
- Pain Clinic
- None
- Other:

Smartphone Applications (Apps)

How confident are you that Smartphone Apps can help improve anesthesia care ? \*

0   1   2   3   4   5

Apps will NOT improve anesthesia care           Apps will improve anesthesia care

Why ? (optional)

Your answer

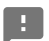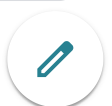

In which phase of peri-operative care can Smartphone Apps be more useful ? \*

- Pre-operatively
- Intra-operatively
- Post-operatively
- In the entire peri-operative care phase
- Other:

Which kind of Apps appeal you the most ? \*

- Digital books
- Interactive anatomy models
- Static calculation Apps (fixed dose calculation)
- Dynamic calculation Apps (TCI modelling)
- Monitoring Apps (sensor use for monitoring purposes)
- Other:

Do you use any mobile Apps to aid your Anesthesia Care ? \*

- Yes
- No

If yes, which ?

Your answer

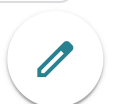

## Smartphone Peripherals

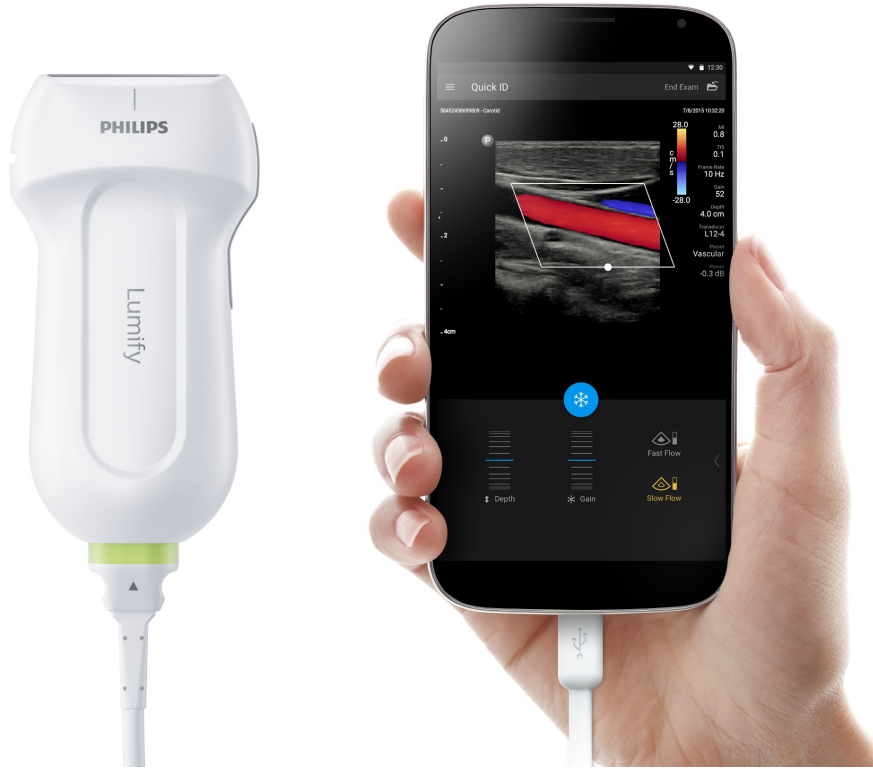

How confident are you that combining your smartphone with a dedicated monitoring peripheral can help improve anesthesia care ? \*

0 1 2 3 4 5

Smartphone Peripherals will NOT improve anesthesia care

     

Smartphone Peripherals will improve anesthesia care

Why ? (optional)

Your answer

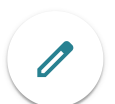

In which phase of peri-operative care can Smartphone Peripherals be more useful ? \*

- Pre-operatively
- Intra-operatively
- Post-operatively
- In the entire peri-operative care phase
- Other:

Do you use any smartphone Peripherals to aid your Anesthesia Care ? \*

- Yes
- No

If yes, which ?

Your answer

**Your wishes and expectations**

Which apps would you like to see developed in the coming future ? (optional)

Your answer

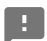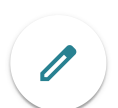

Which peripherals would you like to see developed in the coming future ?  
(optional)

Your answer

### Consent

Do you consent that we use your anonymous answers for publication purposes ?  
\*

Yes

No

\* Consent might be withdrawn at anytime by contacting the author at: [hnogueir@vub.ac.be](mailto:hnogueir@vub.ac.be)

Page 1 of 1

Submit

Never submit passwords through Google Forms.

This content is neither created nor endorsed by Google. [Report Abuse](#) - [Terms of Service](#) - [Privacy Policy](#).

Google Forms

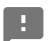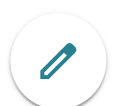

Supplement: MOESM1 [file 17765712]
